# Supplementary material for: Evaluation of the Different Fractions of Organic Matter in an Electrochemical Treatment System Applied to Stabilized Leachates from the Bordo Poniente Landfill in Mexico City
Source: MDPI journal article supplement (doi:10.3390/app13095605), 2023-05-01
Supplement: s1 [file s1]

Archive with 1 entries (1 files):
- applsci-2369152-supplementary.pdf
