# Supplementary figures and images for: Evaluation of the Different Fractions of Organic Matter in an Electrochemical Treatment System Applied to Stabilized Leachates from the Bordo Poniente Landfill in Mexico City
Source: MDPI journal article supplement (doi:10.3390/app13095605), 2023-05-01

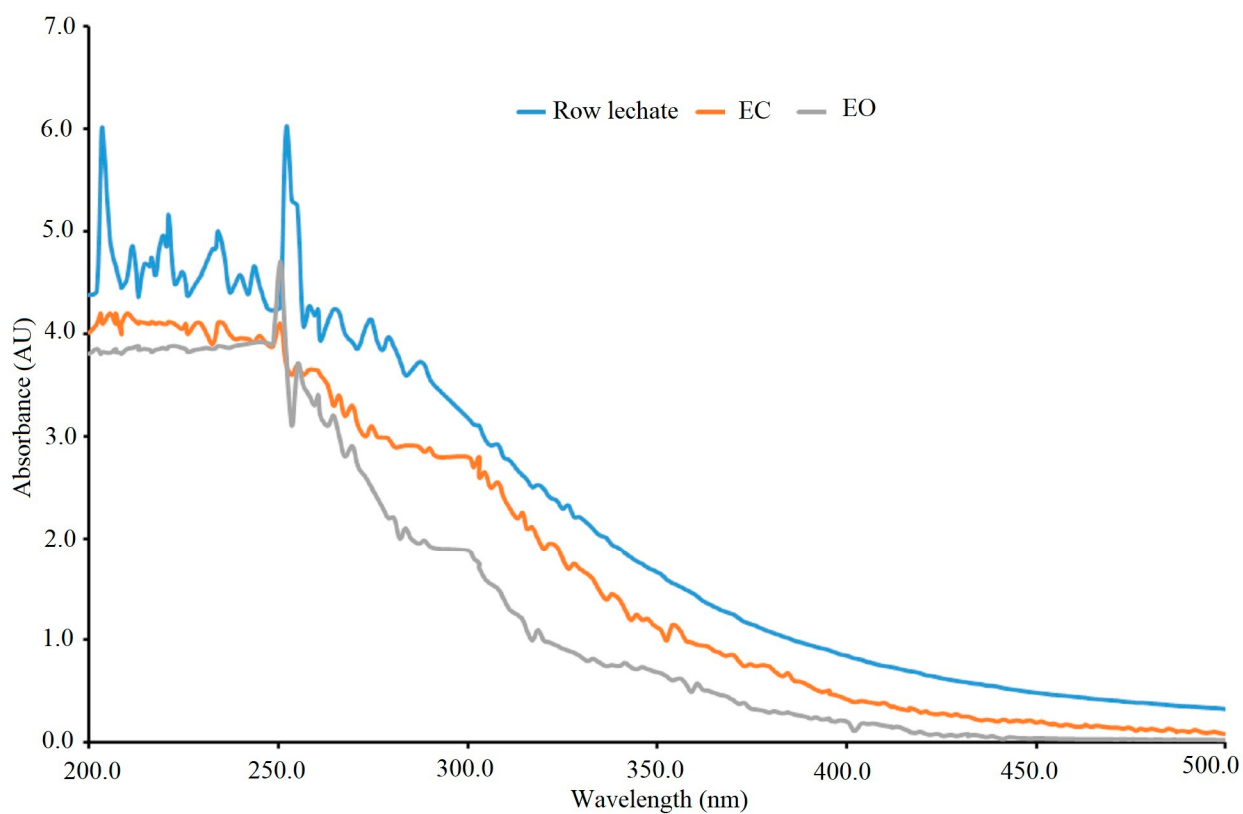

**Figure S1.** UV-VIS spectra of leachates and effluents at optimum conditions. AU: absorbance units.

Supplement: s1 [file s1 › applsci-2369152-supplementary.pdf]
